# Supplementary material
Source: PubMed Central journal article supplement (PMC5064867)
Supplement: NIHMS809992-supplement-17.pdf [file NIHMS809992-supplement-17.pdf]

|                                | Primary Sample 1                                                                           | Primary Sample 2                            |
|--------------------------------|--------------------------------------------------------------------------------------------|---------------------------------------------|
| <b>Patient Characteristics</b> |                                                                                            |                                             |
| Age                            | 82                                                                                         | 62                                          |
| Gender                         | Male                                                                                       | Female                                      |
| <b>Tumor Characteristics</b>   |                                                                                            |                                             |
| Diagnosis                      | AML with monocytic differentiation                                                         | AML (therapy-related)                       |
| Diagnostic tissue              | Peripheral blood                                                                           | Bone marrow                                 |
| Involvement by Leukemia (%)    | 43                                                                                         | 6                                           |
| Immunophenotype                |                                                                                            |                                             |
| Positive                       | CD45 (dim), HLA-DR, CD56 (subset), CD13, CD33, CD15, CD14 (variable), CD11b (subset), CD64 | N/A                                         |
| Negative                       | CD34, CD117                                                                                | N/A                                         |
| Karyotype                      | Normal (46,XY)                                                                             | 46,XX, t(1;16)(p32;p13.1), t(8;21)(q22;q22) |
| Molecular abnormalities        | FLT3, NPM1, TET2 mutations                                                                 | None detected                               |
| Prior AML therapy              | Hydroxyurea x 3 days                                                                       | None                                        |

### Supplementary Table 1

Clinical characteristics of primary AML samples studied with a serial SMR array.
